# Supplementary material
Source: PubMed Central journal article supplement (PMC2374378)
Supplement: 97320630002316S1.pdf [file 97320630002316S1.pdf]

### Supplementary material

**Equations:**

$$D(X) = D(n_1, n_2, \dots, n_s) = N \log_2 N - \sum_{i=1}^s n_i \log_2 n_i \quad \rightarrow \quad (1)$$

Where  $(N = \sum_i n_i)$

$$ID(X, S) = D(X + S) - D(X) - D(S) \quad \rightarrow \quad (2)$$

$$\xi = \log \frac{p}{q} - \frac{\delta_1 - \delta_2}{2} - \frac{1}{2} \log \frac{|\Sigma_1|}{|\Sigma_2|} \quad \rightarrow \quad (3)$$

$$\delta_i = (\mathbf{R} - \boldsymbol{\mu}_i)^T \Sigma_i^{-1} (\mathbf{R} - \boldsymbol{\mu}_i), \quad (i=1,2)$$

where p and q denote the size of positive and negative group respectively and  $|\Sigma|$  is the determinant of matrix  $\Sigma$ .

|                     | $\xi_0$ | Sn(%) | Sp(%) | PPV(%) | CC   |
|---------------------|---------|-------|-------|--------|------|
| Training set        | 3       | 76.75 | 97.13 | 72.78  | 0.72 |
|                     | 0       | 81.05 | 95.96 | 66.74  | 0.71 |
|                     | -3      | 87.75 | 93.14 | 56.11  | 0.67 |
| Test set, Step 50   | 3       | 74.98 | 99.27 | 13.09  | 0.31 |
|                     | 0       | 78.56 | 98.70 | 8.16   | 0.25 |
|                     | -3      | 85.83 | 96.46 | 3.45   | 0.17 |
| Test set, Step 500  | 3       | 75.96 | 99.27 | 47.95  | 0.60 |
|                     | 0       | 79.57 | 98.72 | 35.45  | 0.53 |
|                     | -3      | 85.74 | 96.47 | 17.73  | 0.38 |
| Test set, Step 1000 | 3       | 78.04 | 99.30 | 65.58  | 0.71 |
|                     | 0       | 81.46 | 98.69 | 51.50  | 0.64 |
|                     | -3      | 87.97 | 96.52 | 30.26  | 0.50 |

**Table 1:** Prediction on typical TSSs using IDQD and evaluated by Sn, Sp, PPV and CC. Calculations are given in three thresholds,  $\xi_0=0, +3$  and  $-3$ . When  $\xi_0=3$  both sensitivity and positive predictive values, exceed 65% in test set of step 1000 bp where the ratio of the size of positive set to negative is 1:58.

|                     | Area under ROC (%)                                                  | Area under PRC (%)                                                  |
|---------------------|---------------------------------------------------------------------|---------------------------------------------------------------------|
| Training set        | 96.69                                                               | 81.28                                                               |
| Test set, step 50   | 96.63 (ARTS 92.77; Eponine 88.48; McPromoter 92.55; First EF 71.29) | 26.15 (ARTS 26.18; Eponine 1.79; McPromoter 6.32; First EF 6.54)    |
|                     | 97.28 (ARTS 93.44; Eponine 91.51; McPromoter 93.59; First EF 90.25) | 64.06 (ARTS 57.19; Eponine 40.80; McPromoter 24.23; First EF 40.89) |
| Test set, step 1000 | 98.10 (ARTS 93.85; Eponine 92.07; McPromoter 93.80; First EF 92.86) | 76.03 (ARTS 67.71; Eponine 52.75; McPromoter 35.43; First EF 56.00) |

**Table 2:** Prediction on typical TSSs using IDQD and evaluated by developing auROC and auPRC is shown. The results by Sonnenburg and colleagues [8] are given in brackets for comparison. Our test set of step 50 (the ratio of the number of positives to negatives 1567:1063726) is comparable with chunk size 50 in the case of this reference where the ratio of the number of positives to negatives is 1588:1087664. Our test set of step 500 (the ratio of the number of positives to negatives 940:106037) is comparable with chunk size 500 where the ratio of the number of positives to negatives is 943:108783. The test set of step 1000 (the ratio of the number of positives to negatives 906:52853) is also comparable with the chunk size 1000 in this case.

---

**Definition:****ID definition:****6 mer:**

The difference of sequence construction between promoters and non-promoters were used to choose 6-mer frequencies as the main source of information for TSS identification. We used 6-mer frequencies in a shifted window of step 1 between -1000bp and -501bp, we defined diversity  $D(X)$  of sequence  $X$  as  $X_1$ , and defined ID between  $X_1$  and diversity of standard source in positive (negative) training set as  $I_1$  ( $I_2$ ). Similarly we used 6-mer frequencies in shifted windows between -500bp to -1bp, +1bp (TSS) to +500bp, and +501bp to +1000bp, we defined diversity of sequence  $X$  as  $X_2$ ,  $X_3$  and  $X_4$ , respectively. The corresponding IDs with positive (negative) training sets as  $I_3(I_4)$ ,  $I_5(I_6)$  and  $I_7(I_8)$ . The dimension of each of above IDs is to the order of  $4^6 = 4096$ .

**5 mer:**

The site-specific information in initiator near TSS were used to choose 5-mer frequencies in consecutive four 25 bp-long sequences in -200bp:-101bp (defining diversity  $X_5$ ), -100bp:-1bp (defining diversity  $X_6$ ), +1bp:+100bp (defining diversity  $X_7$ ), +101bp:+200bp (defining diversity  $X_8$ ) and +201bp:+300bp (defining diversity  $X_9$ ) as the sources of information for recognizing TSS. The diversity  $X_5$  is defined by 5-mer frequencies in -200bp:-176p, -175bp:-151bp, -150bp:-126bp and -125bp:-101bp, and the corresponding ID with positive (negative) training sets  $I_9(I_{10})$  has dimension  $4 \times 4^5 = 4096$ . The other four diversities  $X_6$ ,  $X_7$ ,  $X_8$ ,  $X_9$  are defined in the same way and the corresponding IDs are denoted by  $I_{11}$  to  $I_{18}$ .

**4 mer:**

The structural information near the TSS were used to choose 4-mer frequencies in consecutive sixteen 25 bp-long sequences in -600bp:-201bp, -200bp:+200bp and +201bp:+600bp. The three diversities are denoted by  $X_{10}$ ,  $X_{11}$ ,  $X_{12}$  and the corresponding IDs by  $I_{19}$  to  $I_{24}$ . Each ID has dimension  $16 \times 4^4 = 4096$ .

**G+C content:**

The G+C contents in each of 10bp interval from -1000bp to +1000bp were used to define diversity  $X_{13}$  and the corresponding IDs  $I_{25}$  and  $I_{26}$  (with dimension 200). The CpG content was calculated in each of 200bp interval from -1000bp to +1000bp and thus was used to define diversity  $X_{14}$  and the corresponding IDs  $I_{27}$  and  $I_{28}$  (with dimension 10).

**Discriminant vector:**

A Discriminant vector for sequence  $X$  is defined by  $R = I_1, I_2, \dots, I_{28}$ .  $X \in G_i$  ( $i = 1$ , positive group and  $i = 2$ , negative group) and the average of  $R$  over positive group or negative group is  $\mu_1$  or  $\mu_2$  and the corresponding covariance is  $\Sigma_1$  or  $\Sigma_2$  in Equation (3).

**ROC and PRC**

The ROC and PRC curves (corresponding to Table 2) for test set step 500 is developed in Figure 1.

**Performance measure**

$$Sn = [TP / (TP + FN)] \times 100\% \quad PPV = [TP / (TP + FP)] \times 100\%$$

$$Sp = [TN / (TN + FP)] \times 100\% \quad CC = \frac{(TP \times TN) - (FN \times FP)}{\sqrt{(TP + FN) \times (TN + FP) \times (TP + FP) \times (TN + FN)}}$$

TP = true positive; TN = true negative; FN = false negative; FP = false positive
